# Supplementary material for: Dual therapy with corticosteroid ablates the beneficial effect of DP2 antagonism in chronic experimental asthma
Source: Springer Nature journal article supplement (doi:10.1038/s41467-024-54670-8), 2024-11-26
Supplement: MOESM1 [file 41467_2024_54670_MOESM1_ESM.pdf]

**TITLE: Dual therapy with corticosteroid ablates the beneficial effect of DP2 antagonism in chronic experimental asthma.**

Md Ashik Ullah<sup>1</sup>, Sonja Rittchen<sup>1,2</sup>, Jia Li<sup>1,3</sup>, Bodie F. Curren<sup>1,4</sup>, Patricia Namubiru<sup>1,4</sup>, Tufael Ahmed<sup>1</sup>, Daniel R. Howard<sup>1,4</sup>, Muhammed Mahfuzur Rahman<sup>1,4</sup>, Md Al Amin Sikder<sup>1,4</sup>, Ridwan B. Rashid<sup>1,4</sup>, Natasha Collinson<sup>1</sup>, Mary Lor<sup>1</sup>, Mark L. Smythe<sup>5</sup>, Simon Phipps<sup>1,4,6,7</sup>.

<sup>1</sup> Respiratory Immunology Laboratory, QIMR Berghofer Medical Research Institute, Herston, Queensland 4006, Australia;

<sup>2</sup> Otto Loewi Research Center for Vascular Biology, Immunology and Inflammation, Division of Pharmacology, Medical University of Graz, Graz 8010, Austria;

<sup>3</sup> Department of Laboratory Medicine, Shanghai General Hospital, Shanghai Jiao Tong University School of Medicine, Shanghai, 20080, China;

<sup>4</sup> School of Biomedical Sciences, University of Queensland, Queensland 4072, Australia;

<sup>5</sup> Institute for Molecular Bioscience, University of Queensland, Queensland 4072, Australia;

<sup>6</sup> Australian Infectious Diseases Research Centre, University of Queensland, Queensland 4072, Australia.

<sup>7</sup> School of Biomedical Sciences, Queensland University of Technology, Queensland 4000, Australia;

## SUPPLEMENTARY FIGURES

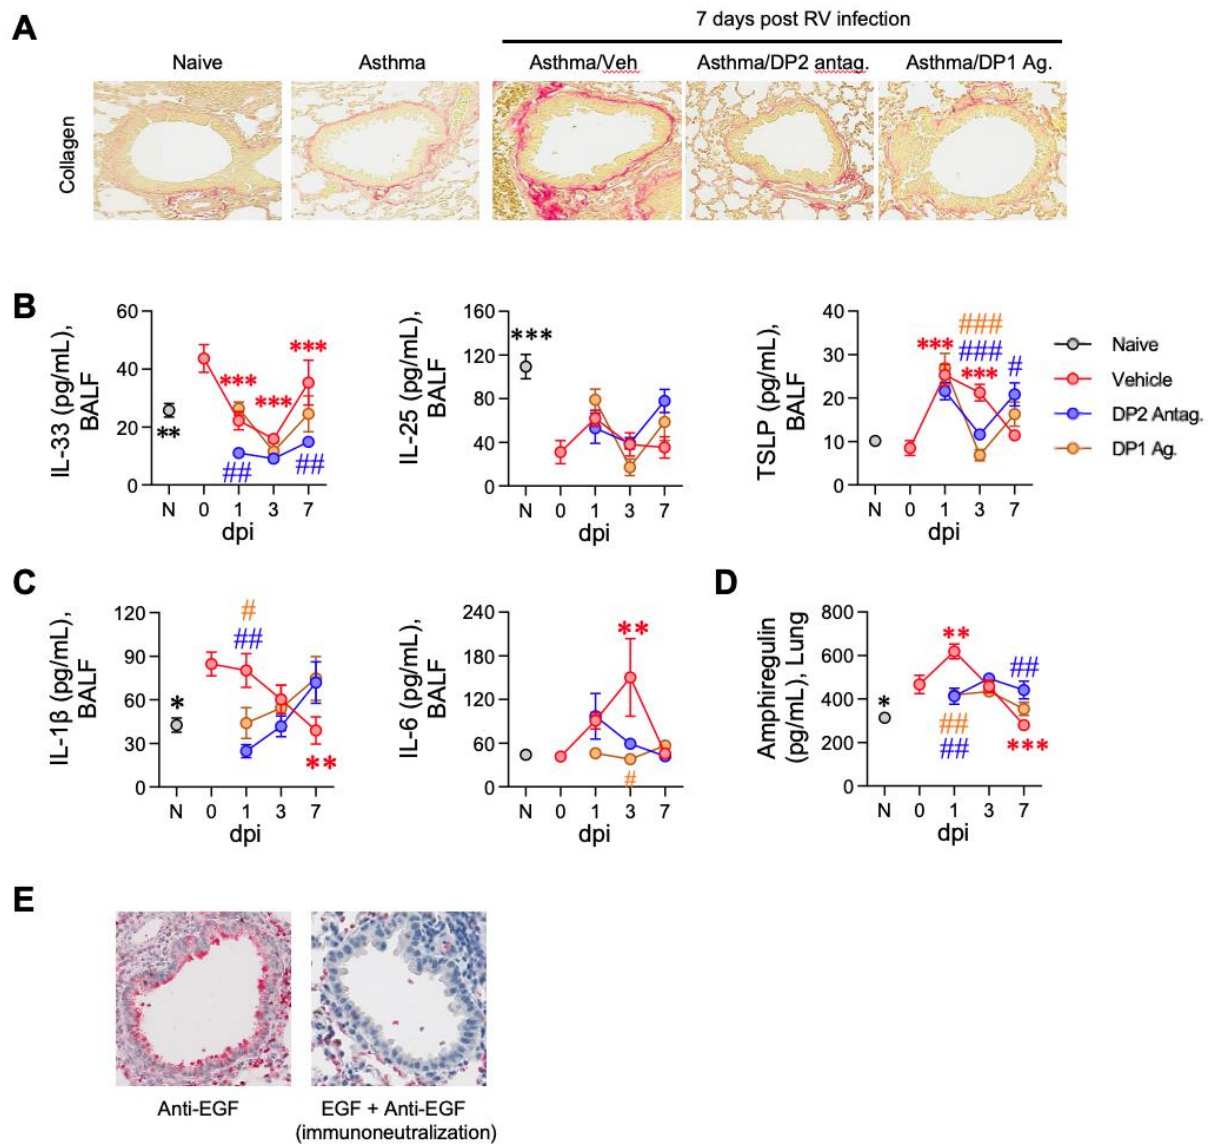

**FIGURE S1. DP2 antagonism or DP1 agonism modulates the inflammatory response to RV-inoculation in mice with CEA.**

Mice with CEA were inoculated with RV-1b and treated daily with a DP2 antagonist, a DP1 agonist, or vehicle starting from day 99. Mice were euthanized at 1, 3 and 7 dpi. (A) Representative lung histology of collagen expression (picrosirius red staining). (B-D) Cytokines were measured in the BALF or lung homogenates as indicated on the Y axis. (E) Specificity of EGF immunoreactivity was confirmed by preincubation of the antibody with exogenous EGF. Data are presented as mean  $\pm$  SEM and are

representative of two independent experiments showing similar results (n = 4-11 mice per group). Statistical significance between different time points or different groups was determined using one-way ANOVA with Dunnett's multiple comparison test. \* denotes  $p < 0.05$ ; \*\* denotes  $p < 0.01$  and \*\*\* denotes  $p < 0.001$  compared to Vehicle group. # denotes  $p < 0.05$ , ## denotes  $p < 0.01$  and ### denotes  $p < 0.001$  compared to RV-infected group at corresponding time point. Source data are provided as a Source Data file.

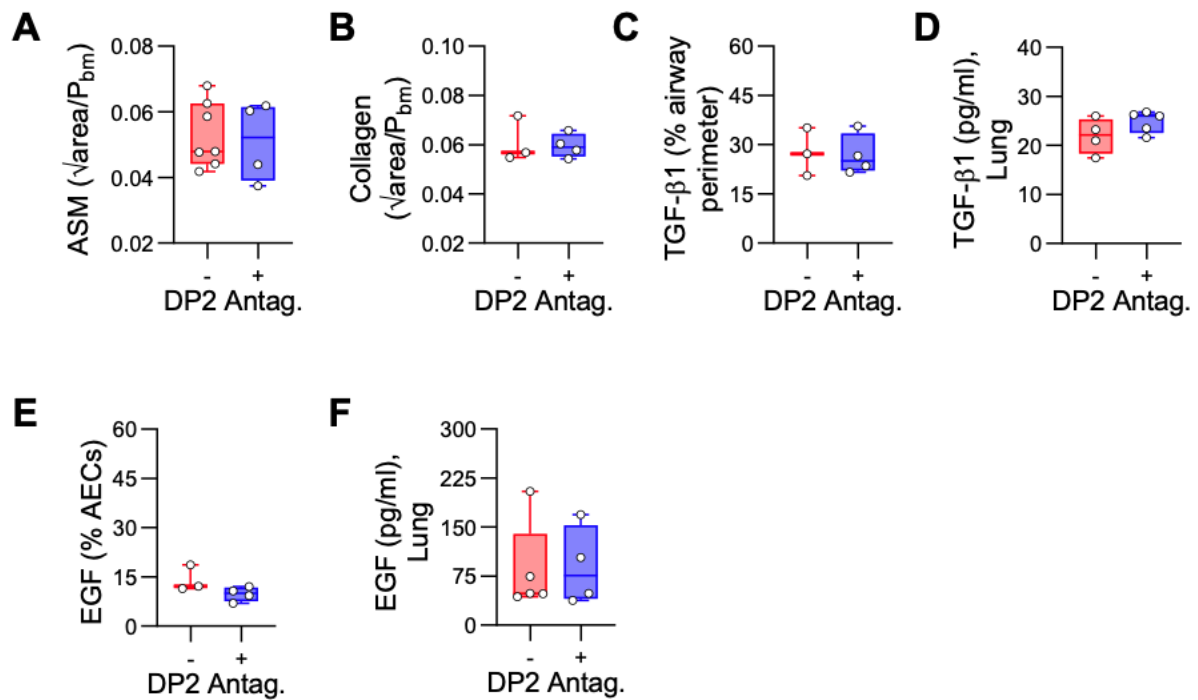

**FIGURE S2. DP2 antagonism does not ameliorate airway remodelling in mice with chronic asthma.**

Mice with chronic asthma were treated with DP2 antagonist, OC000459 daily from day 99 and were euthanized on day 108. (A) ASM area. (B) Collagen area. (C) Quantification of TGF- $\beta$ 1 immunoreactivity around airways. (D) TGF- $\beta$ 1 levels in lung homogenates. (E) Quantification of EGF immunoreactivity in AECs. (F) EGF levels in lung homogenates. Data are presented as box-and-whisker plots showing individual data points with the boxes representing quartiles and whiskers indicating the range and are representative of two independent experiments showing similar results (n = 3-7 mice per group). Group differences were analyzed using the Mann-Whitney U test. Source data are provided as a Source Data file.

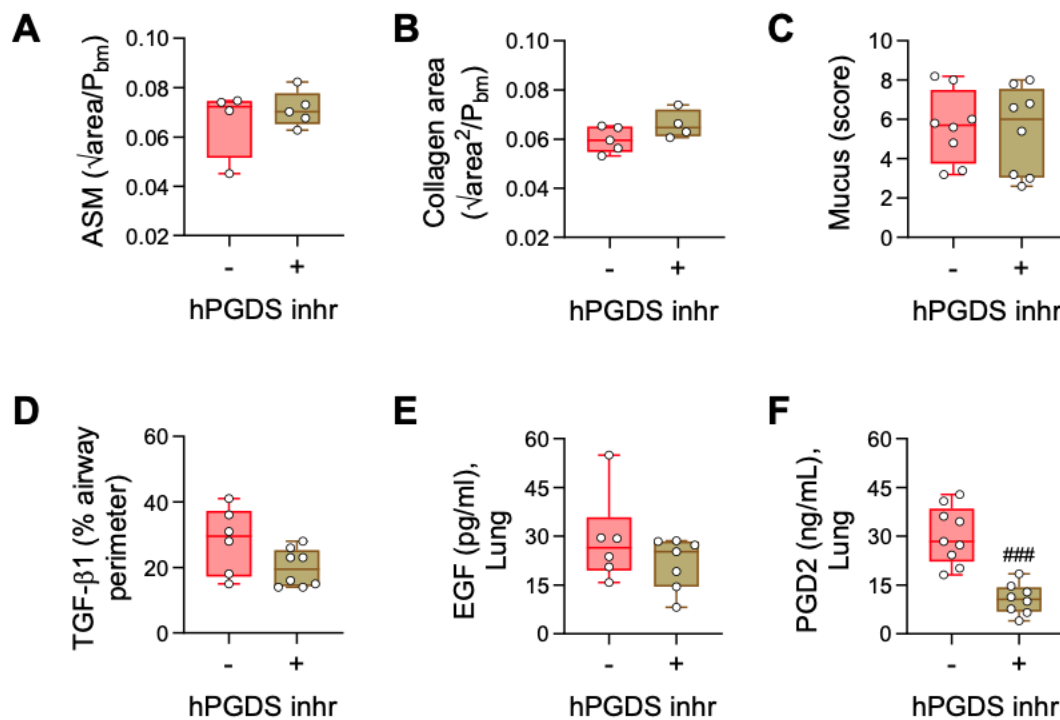

**FIGURE S3. Inhibition of h-PGDS does not resolve airway remodelling during RV-induced exacerbation of chronic asthma.**

Mice with chronic asthma were inoculated with RV-1b on day 101. Separate group of RV-1b infected mice were treated with h-PGDS inhibitor (PK007) daily from day 99 onwards and euthanized 3 days post infection. (A) ASM area. (B) Collagen area. (C) Muc5ac score. (D) Quantification of TGF- $\beta$ 1 immunoreactivity around airways. (E) Lung EGF levels in homogenates. (F) Lung PGD2 levels. Data are presented as box-and-whisker plots showing individual data points with the boxes representing quartiles and whiskers indicating the range and are representative of two independent experiments showing similar results (n = 4-9 mice per group). Group differences were analyzed using the Mann-Whitney U test. ### denotes p<0.001. Source data are provided as a Source Data file.

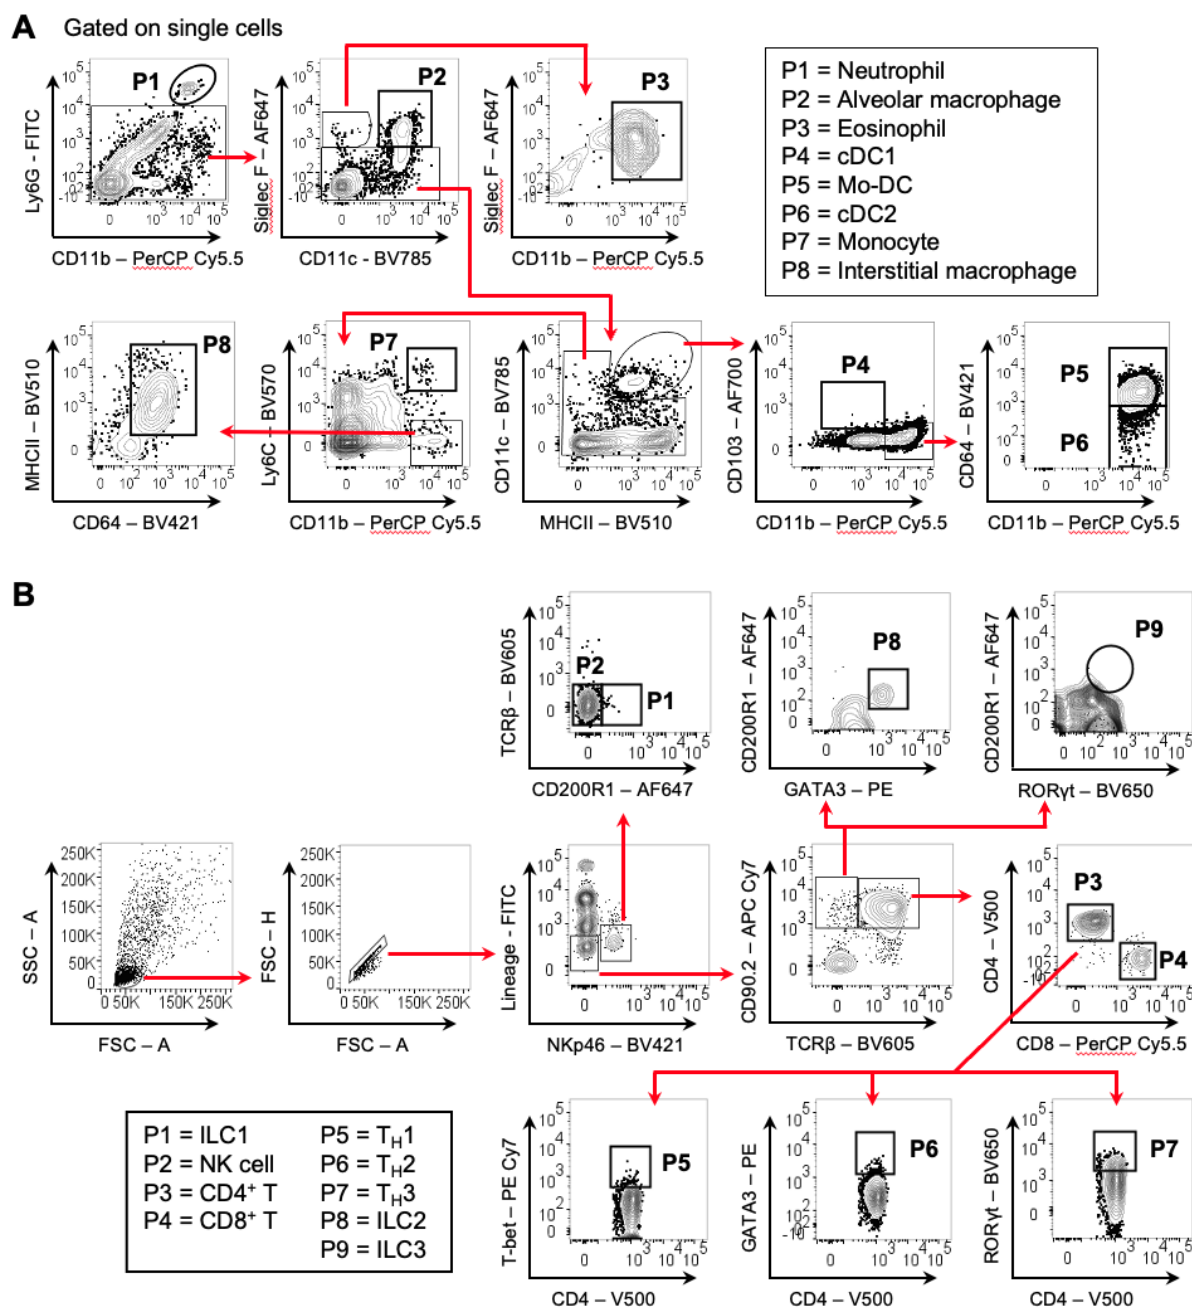

**FIGURE S4. Gating strategies of immune cells in the lung.**

Representative flow cytometry plots depicting the gating strategies for lung immune cells.

**FIGURE S5.**

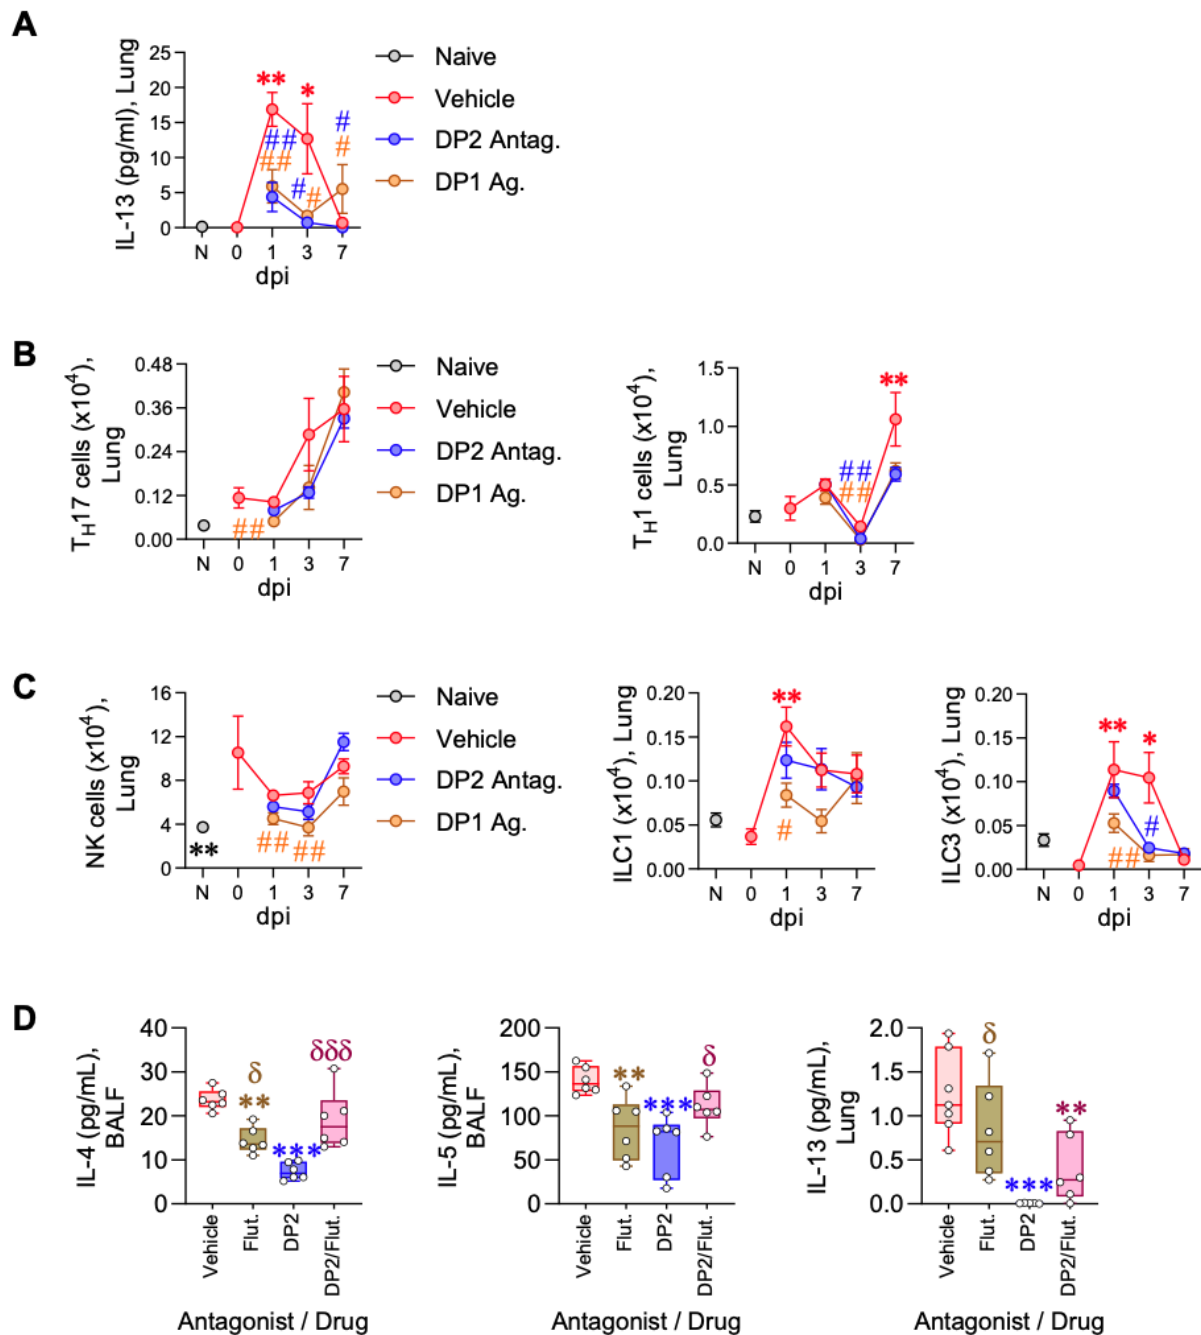

**FIGURE S5. Effect of drug treatment on RV-induced inflammation in mice with CEA.**

Mice with chronic asthma were inoculated with RV-1b and treated with DP2 antagonist or DP1 agonist or vehicle daily starting from day 99. Mice were euthanized at 1, 3 and 7 dpi. (A) IL-13 expression in the lungs. (B) Number of  $T_H17$  (ROR $\gamma$ t $^+$ CD4 $^+$  T) and  $T_H1$  (T-bet $^+$ CD4 $^+$  T) cells in the lungs. (C) Number of NK cells

(CD3 $\epsilon$ <sup>-</sup>CD19<sup>-</sup>NK1.1<sup>+</sup>NKp46<sup>+</sup>CD200R1<sup>-</sup>), ILC1s (CD3 $\epsilon$ <sup>-</sup>CD19<sup>-</sup>CD45R<sup>-</sup>CD11c<sup>-</sup>Gr-1<sup>-</sup>NK1.1<sup>+</sup>NKp46<sup>+</sup>CD90.2<sup>+</sup>CD200R1<sup>+</sup>T-bet<sup>+</sup>) and ILC3s (CD3 $\epsilon$ <sup>-</sup>CD19<sup>-</sup>CD45R<sup>-</sup>CD11c<sup>-</sup>Gr-1<sup>-</sup>CD11b<sup>-</sup>CD90.2<sup>+</sup>CD200R1<sup>+</sup>ROR $\gamma$ t<sup>+</sup>) in the lungs. Data are presented as mean  $\pm$  SEM and are representative of two independent experiments showing similar results (n = 4-7 mice per group). \* denotes p<0.05 and \*\* denotes p<0.01 compared to Vehicle group. # denotes p<0.05 and ## denotes p<0.01 compared to RV-infected group at corresponding time point. (D) RV-1b infected mice were treated with vehicle or DP2 antagonist or fluticasone or both DP2 antagonist and fluticasone daily from day 99 and euthanized at 7 dpi. Concentrations of IL-4 and IL-5 in the BALF and IL-13 in the lungs. Data are presented as box-and-whisker plots showing individual data points with the boxes representing quartiles and whiskers indicating the range and are representative of two independent experiments showing similar results (n = 4-7 mice per group). Statistical significance between different time points or different groups was determined using one-way ANOVA with Dunnett's multiple comparison test. \* denotes p<0.05; \*\* denotes p<0.01 and \*\*\* denotes p<0.001 compared to vehicle group.  $\delta$  denotes p<0.05 and  $\delta\delta\delta$  denotes p<0.001 compared to DP2 antagonist (OC000459) treated group. Source data are provided as a Source Data file.



**FIGURE S6.**

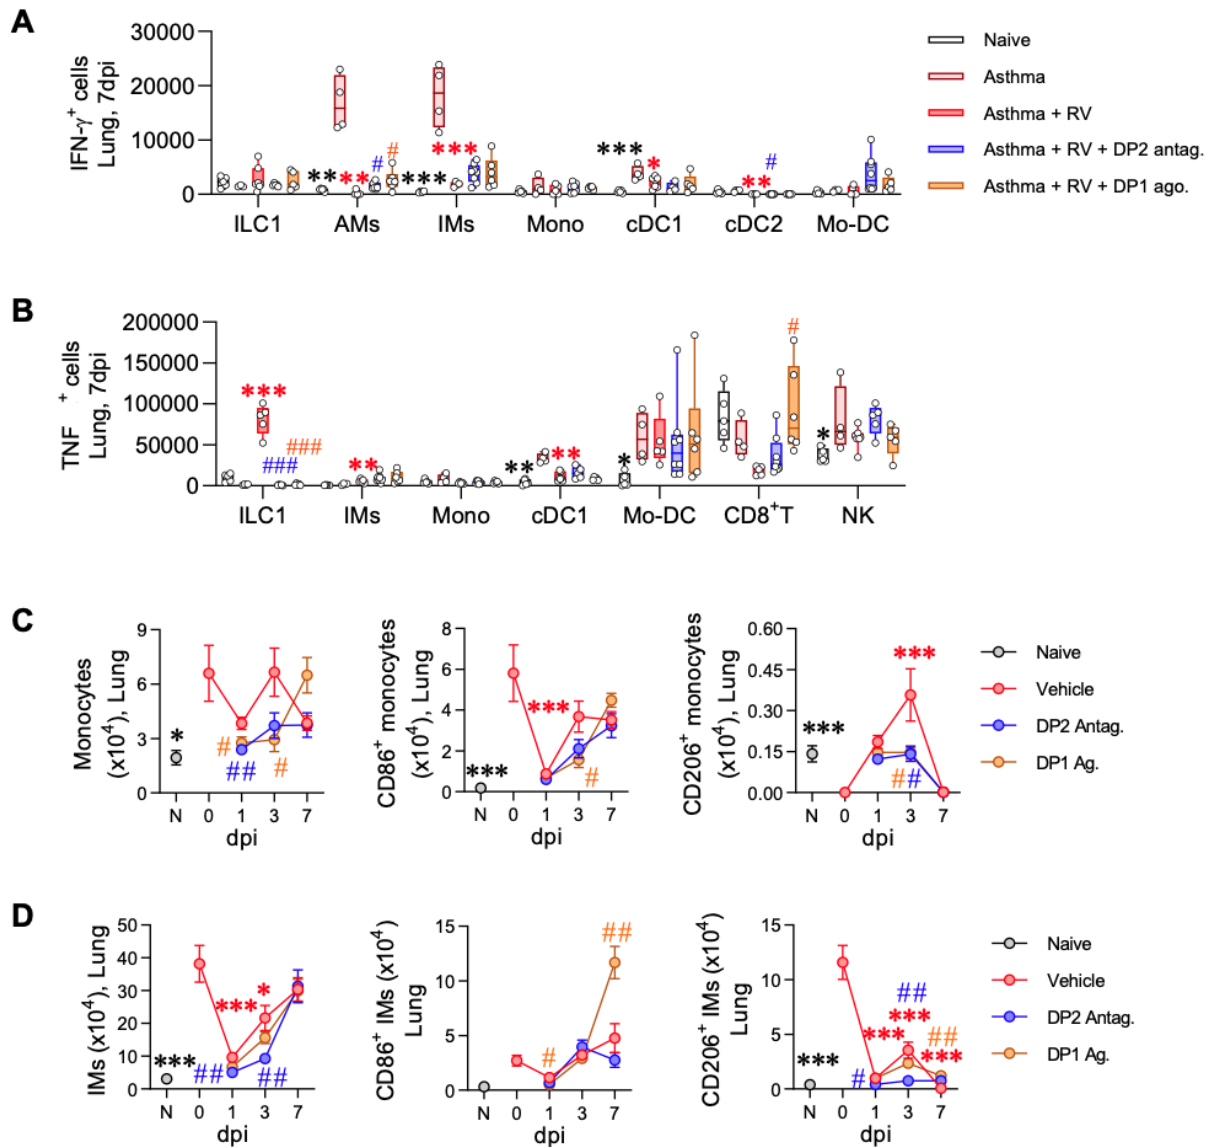

**FIGURE S6.**

Mice with chronic asthma were inoculated with RV-1b and treated with a DP2 antagonist or a DP1 agonist daily starting from day 99. Mice were euthanized at 1, 3 and 7 dpi. (A) Number of IFN- $\gamma$  expressing ILC1, AMs, interstitial macrophages (IMs), monocytes (Mono), conventional type-1 dendritic cells (cDC1), conventional type-2 dendritic cells (cDC2) and monocyte-derived dendritic cells (Mo-DC) in the lungs at 7 dpi. (B) Number of TNF expressing ILC1, IMs, Mono, cDC1, Mo-DC, CD8<sup>+</sup>T and NK cells in the lungs at 7 dpi. (C) Number of total monocytes (CD11b<sup>+</sup>Ly6C<sup>+</sup>SiglecF<sup>-</sup>) and

CD86-expressing and CD206-expressing monocytes in the lungs. (D) Number of total interstitial macrophages (IM; SiglecF<sup>+</sup>Ly6C<sup>-</sup>CD11b<sup>+</sup>MHCII<sup>+</sup>CD64<sup>+</sup>) and CD86-expressing and CD206-expressing IMs in the lungs. Data are presented as mean  $\pm$  SEM or box-and-whisker plots showing individual data points with the boxes representing quartiles and whiskers indicating the range and are pooled data from two independent experiments showing similar results (n = 4-8 mice per group). Statistical significance between different time points or different groups was determined using one-way ANOVA with Dunnett's multiple comparison test. \* denotes p<0.05; \*\* denotes p<0.01 and \*\*\* denotes p<0.001 compared to asthma or vehicle group at 0 dpi. # denotes p<0.05, ## denotes p<0.01 and ### denotes p<0.001 compared to RV-infected group at corresponding time point. Source data are provided as a Source Data file.

**FIGURE S7.**

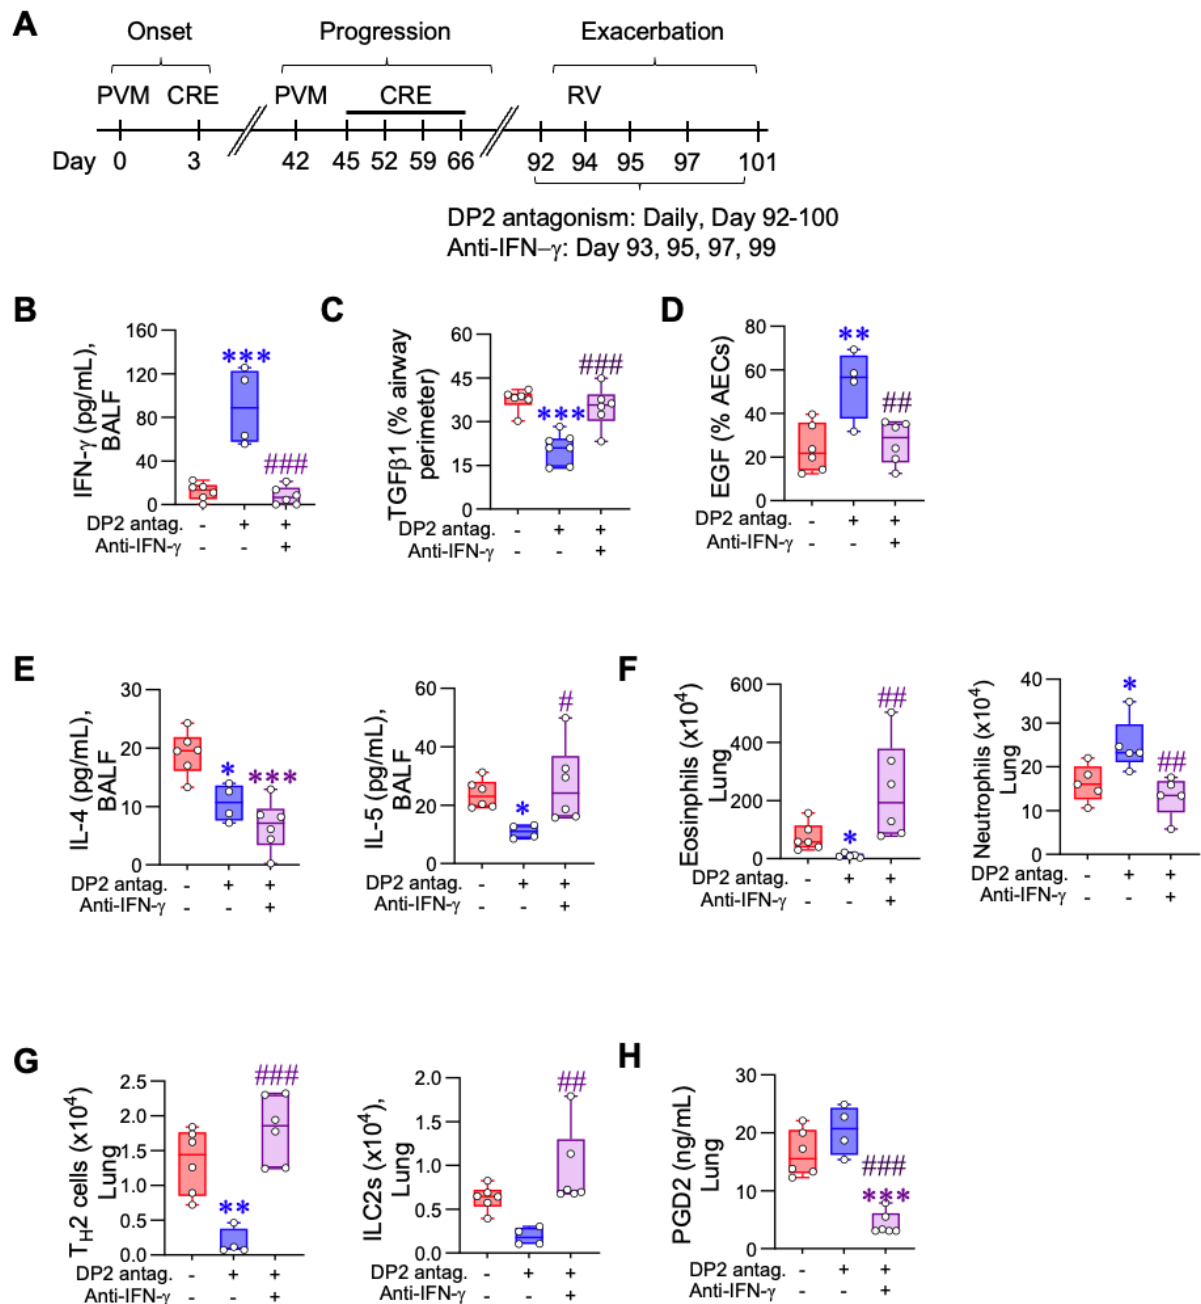

**Figure S7.**

(A) Study design. RV-1b infected mice were given vehicle or DP2 antagonist and treated with anti-IFN- $\gamma$ . Mice were euthanized at 7 dpi. (B) IFN- $\gamma$  expression in the BALF. (C) Quantification of TGF- $\beta$ 1 immunoreactivity around the airways. (D) Quantification of EGF immunoreactivity in AECs. (E) Concentrations of IL-4 and IL-5 in the BALF. (F) Number of eosinophils and neutrophils in the lungs. (G) Number of

T<sub>H</sub>2 cells and ILC2s in the lungs. (H) Lung PGD2 levels. Data are presented as box-and-whisker plots showing individual data points with the boxes representing quartiles and whiskers indicating the range and are representative of two independent experiments showing similar results (n = 4-6 mice per group). Statistical significance between different groups was determined using one-way ANOVA with Dunnett's multiple comparison test. \* denotes p<0.05; \*\* denotes p<0.01 and \*\*\* denotes p<0.001 compared to vehicle group. # denotes p<0.05, ## denotes p<0.01 and ### denotes p<0.001 compared to OC000459-treated group. Source data are provided as a Source Data file.

## SUPPLEMENTARY TABLE

**Table S1.** Information of antibodies, kits and reagents used in this study

| Name                                | Supplier                 |
|-------------------------------------|--------------------------|
| <b><i>Anti-mouse antibodies</i></b> |                          |
| B220-FITC (RA3-6B2)                 | Biolegend (CA, USA)      |
| CD103-AF700 (2E7)                   | Biolegend (CA, USA)      |
| CD11b-PerCp-Cy5.5, BV605 (M1/70)    | BD Biosciences (CA, USA) |
| CD11c-BV785 (N418)                  | Biolegend (CA, USA)      |
| CD19-FITC (1D3/CD19)                | Biolegend (CA, USA)      |
| CD200R1-AF647 (OX-110)              | BD Biosciences (CA, USA) |
| CD206-PECy7 (C068C2)                | Biolegend (CA, USA)      |
| CD3 $\epsilon$ -FITC (17A2)         | Biolegend (CA, USA)      |
| CD4-FITC (RM4-5)                    | Biolegend (CA, USA)      |
| CD4-V500 (RM4-5)                    | BD Biosciences (CA, USA) |
| CD64-BV421 (X54-5/7.1)              | Biolegend (CA, USA)      |
| CD8-PerCp-Cy5.5 (53-6.7)            | Biolegend (CA, USA)      |
| CD80-APC/Fire750 (16-10A1)          | Biolegend (CA, USA)      |
| CD86-PE (GL-1)                      | Biolegend (CA, USA)      |
| CD90.2-APC Cy7 (53-2.1)             | BD Biosciences (CA, USA) |
| EGF                                 | R&D systems (MN, USA)    |
| F4/80-FITC, APC, APC Cy7 (BM8)      | Biolegend (CA, USA)      |
| FoxP3-AF647 (MF23)                  | BD Biosciences (CA, USA) |
| GATA3-PE (TWAJ)                     | eBiosciences (CA, USA)   |
| Gr-1-FITC (RB6-8C5)                 | Biolegend (CA, USA)      |

|                                           |                          |
|-------------------------------------------|--------------------------|
| IFN- $\gamma$ -PE Cy7 (XMG1.2)            | Biolegend (CA, USA)      |
| Ly6C-BV570 (HK1.4)                        | Biolegend (CA, USA)      |
| Ly6G-FITC (1A8)                           | BD Biosciences (CA, USA) |
| MHCII-BV510 (M5/114.15.2)                 | Biolegend (CA, USA)      |
| Muc5ac (45M1)                             | Invitrogen (CA, USA)     |
| NKp46-BV421 (29A1.4)                      | Biolegend (CA, USA)      |
| ROR $\gamma$ t-BV650 (Q31-378)            | BD Biosciences (CA, USA) |
| Siglec F-PE (E50-2440)                    | BD Biosciences (CA, USA) |
| T-bet-PE Cy7 (4B10)                       | Biolegend (CA, USA)      |
| TCR- $\beta$ -BV605 (H57-597)             | Biolegend (CA, USA)      |
| TER119-FITC (TER-119)                     | Biolegend (CA, USA)      |
| TGF- $\beta$ 1 (polyclonal)               | Abcam (USA)              |
| TNF-FITC (MP6-XT22)                       | BD Biosciences (CA, USA) |
| $\alpha$ -Smooth muscle actin (1A4)       | Sigma-Aldrich (Mo, USA)  |
| <b>Kits</b>                               |                          |
| FoxP3/TF fixation/permeabilization kit    | eBiosciences (CA, USA)   |
| Mouse Amphiregulin ELISA Kit              | R&D systems (MN, USA)    |
| Mouse EGF ELISA Kit                       | R&D systems (MN, USA)    |
| Mouse IFN- $\gamma$ ELISA Kit             | Biolegend (CA, USA)      |
| Mouse IL-13 enhanced sensitivity flex set | BD Biosciences (CA, USA) |
| Mouse IL-1 $\beta$ ELISA Kit              | Biolegend (CA, USA)      |
| Mouse IL-17A ELISA Kit                    | Biolegend (CA, USA)      |
| Mouse IL-4 ELISA Kit                      | BD Biosciences (CA, USA) |
| Mouse IL-5 ELISA Kit                      | BD Biosciences (CA, USA) |

|                                         |                                  |
|-----------------------------------------|----------------------------------|
| Mouse IL-6 ELISA Kit                    | Biolegend (CA, USA)              |
| Mouse IL-25 ELISA Kit                   | Biolegend (CA, USA)              |
| Mouse IL-33 ELISA Kit                   | R&D systems (MN, USA)            |
| Mouse TGF- $\beta$ 1 ELISA kit          | R&D systems (MN, USA)            |
| Mouse TSLP ELISA Kit                    | Biolegend (CA, USA)              |
| Mouse TNF enhanced sensitivity flex set | BD Biosciences (CA, USA)         |
| PGD2-MOX Express ELISA kit              | Cayman Chemicals (Michigan, USA) |
| Zombie Aqua™ Fixable Viability Kit      | Biolegend (CA, USA)              |
| <b>Reagents</b>                         |                                  |
| Brefeldin A                             | Biolegend (CA, USA)              |
| BW245c                                  | Cayman Chemical (MI, USA)        |
| Cockroach extract                       | Greer Laboratories (NC, USA)     |
| Hyclone fetal calf serum                | Cytiva (USA)                     |
| Fluticasone                             | Sigma-Aldrich (MO, USA)          |
| Glycerol gel                            | Sigma-Aldrich (MO, USA)          |
| Hematoxylin, Dako                       | Agilent Technologies (Australia) |
| IGEPAL® CA-630                          | Sigma-Aldrich (MO, USA)          |
| Ionomycin                               | Sigma-Aldrich (MO, USA)          |
| MK-0524                                 | Cayman Chemical (MI, USA)        |
| OC000459                                | Cayman Chemical (MI, USA)        |
| Phorbol 12-myristate 13-acetate (PMA)   | Sigma-Aldrich (MO, USA)          |
| Sirius red                              | Sigma-Aldrich (MO, USA)          |
| Sodium chloride                         | Sigma-Aldrich (MO, USA)          |

|                           |                         |
|---------------------------|-------------------------|
| Sodium deoxycholate       | Sigma-Aldrich (MO, USA) |
| Sodium dodecyl sulfate    | Sigma-Aldrich (MO, USA) |
| Soluble IL-13R $\alpha$ 2 | Pfizer, NY, USA         |
| Tris-base                 | Sigma-Aldrich (MO, USA) |
